# Supplementary material for: Synthesis, structures, and norbornene polymerization behavior of C(sp3), N-chelated palladacycles bearing o-aryloxide-N-heterocyclic carbene ligands
Source: Royal Society of Chemistry journal article supplement (doi:10.1039/c4dt02198c), 2014-01-01
Supplement: c4dt02198c1.pdf [file c4dt02198c1.pdf]

## Supporting Information

### Synthesis, Structures, and Norbornene Polymerization Behavior of C(sp<sup>3</sup>), N-Chelated Palladacycles Bearing *o*-Aryloxy-N-Heterocyclic Carbene Ligands

Liang Dang,<sup>a</sup> Jing Guo,<sup>b</sup> Haibin Song,<sup>a</sup> Binyuan Liu<sup>b</sup> and Baiquan Wang<sup>\*a,c</sup>

<sup>a</sup>State Key Laboratory of Elemento-Organic Chemistry, College of Chemistry, Nankai University, Tianjin 300071, China.

E-mail: bqwang@nankai.edu.cn

<sup>b</sup>Institute of Polymer Science and Engineering, Hebei University of Technology, Tianjin 300130, China

<sup>c</sup>Collaborative Innovation Center of Chemical Science and Engineering (Tianjin), Tianjin 300072, China.

**Figure S1-S10.** <sup>1</sup>H and <sup>13</sup>C NMR spectra of complexes **4a-e**.

**Figure S11.** FT IR spectrum of PNB (entry 7).

**Figure S12.** TGA curve of PNB (entry 7).

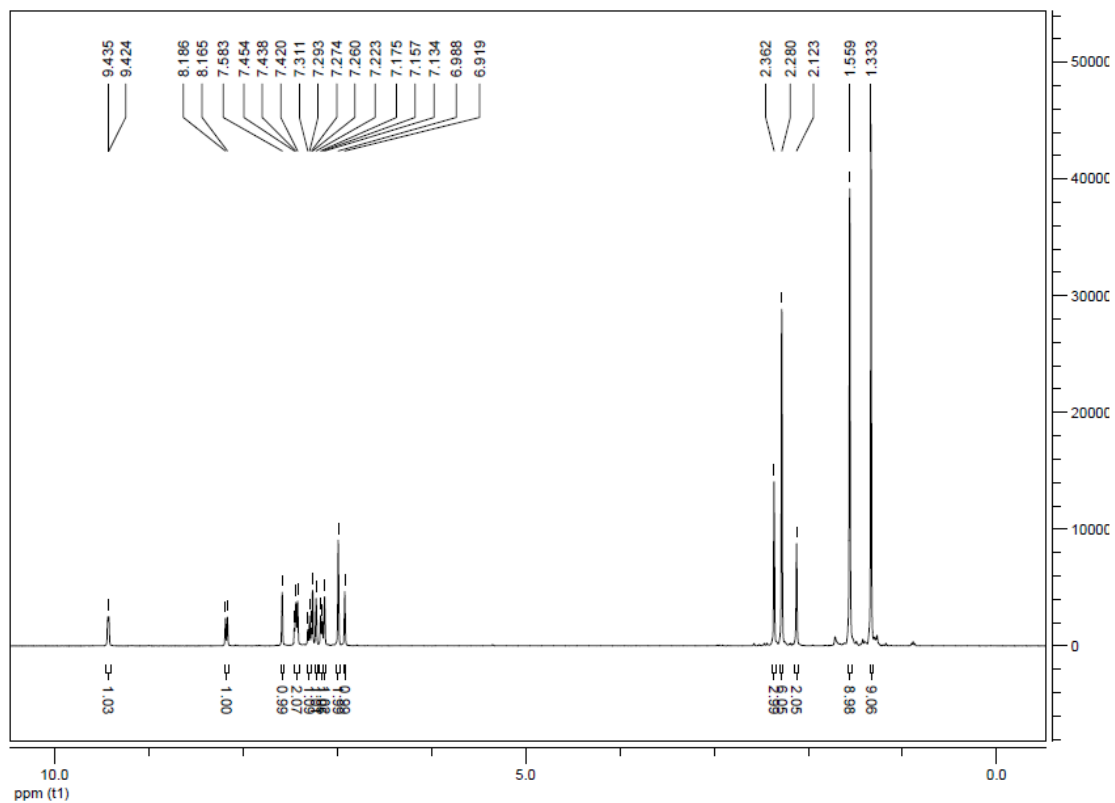

Figure S1.  $^1\text{H}$  NMR(400 MHz,  $\text{CDCl}_3$ ) spectrum of complex **4a**

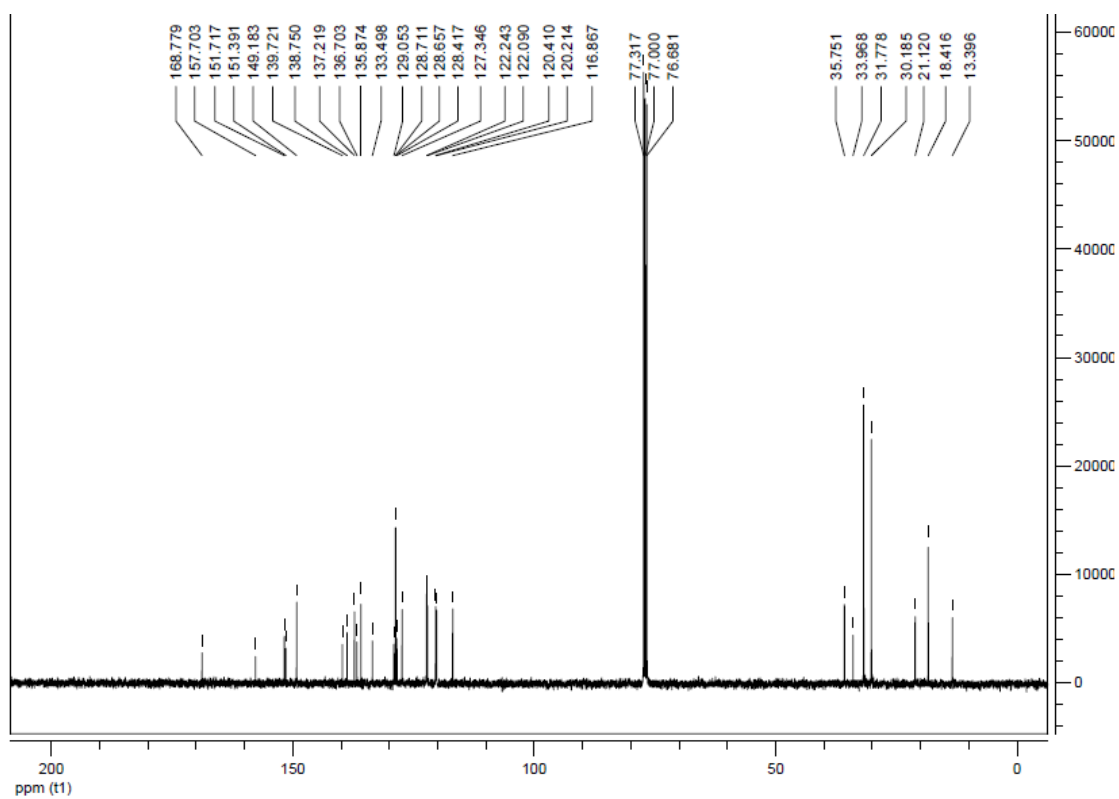

Figure S2.  $^{13}\text{C}$  NMR(100 MHz,  $\text{CDCl}_3$ ) spectrum of complex **4a**

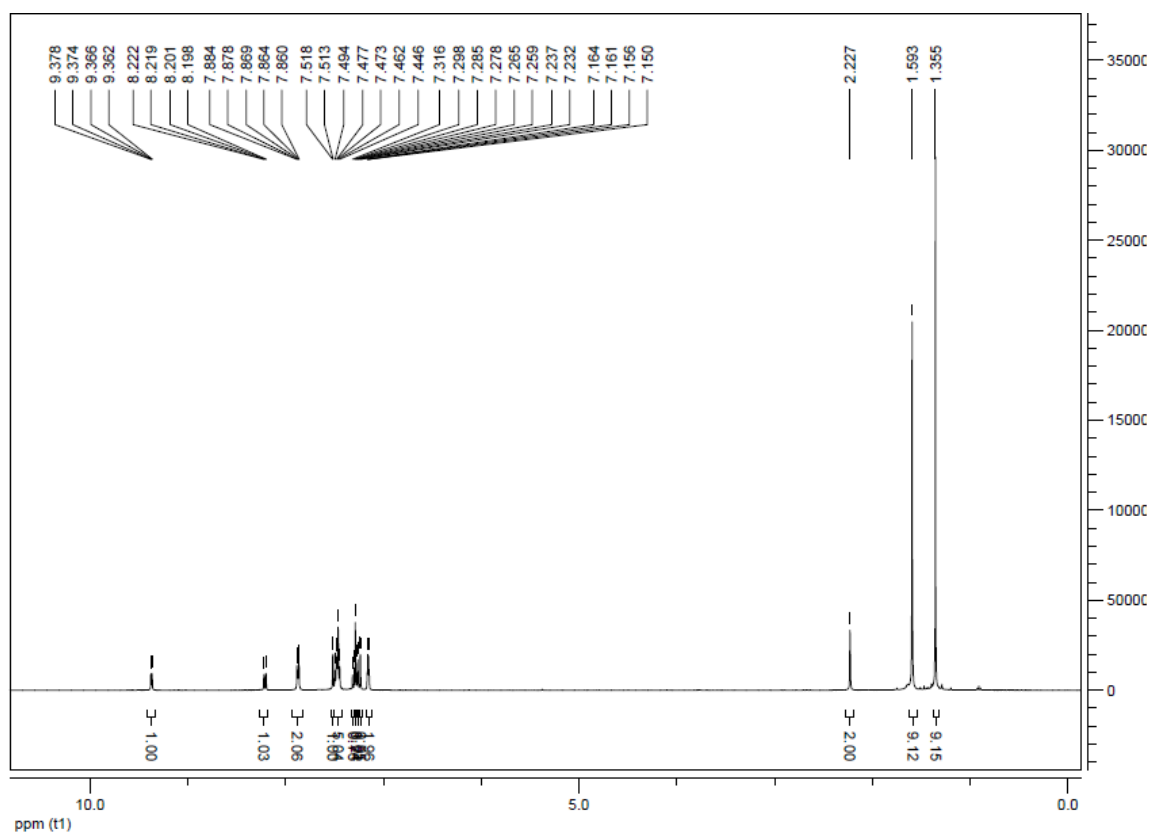

**Figure S3.**  $^1\text{H}$  NMR(400 MHz,  $\text{CDCl}_3$ ) spectrum of complex **4b**

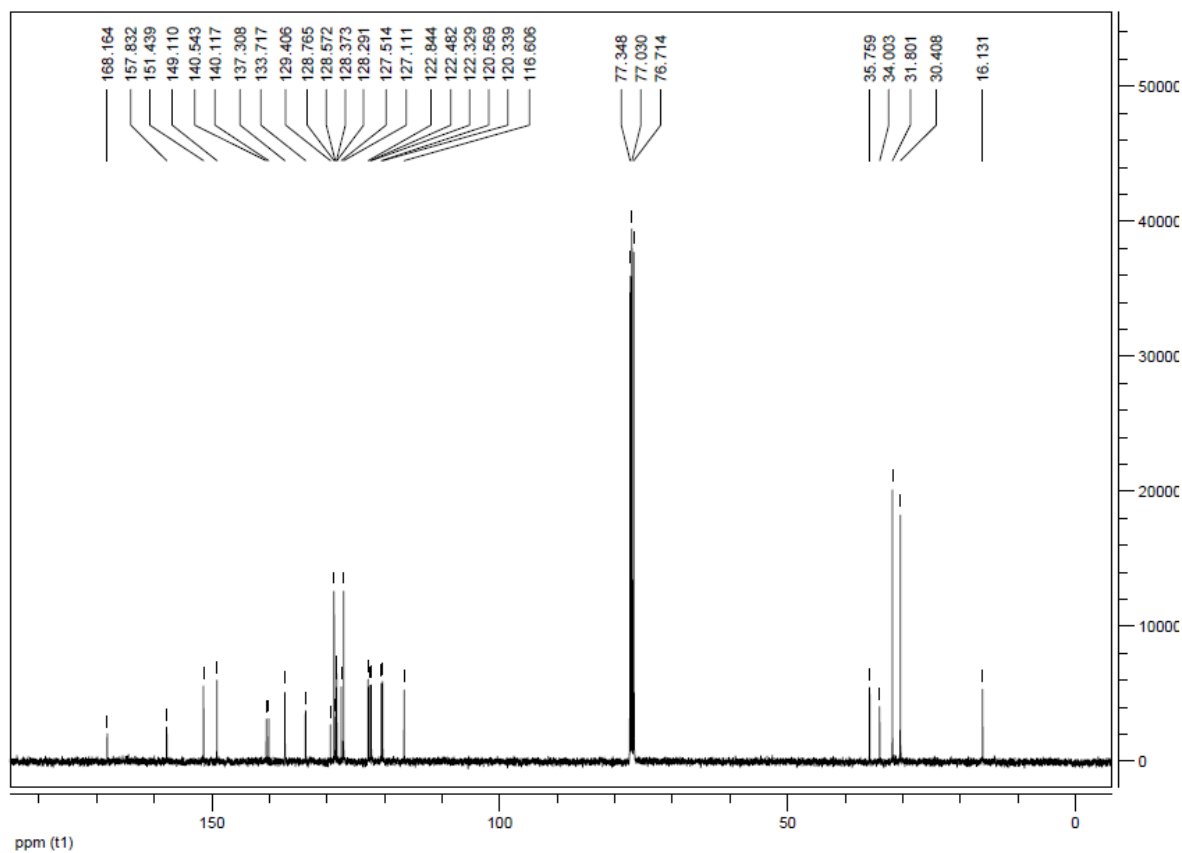

**Figure S4.**  $^{13}\text{C}$  NMR(100 MHz,  $\text{CDCl}_3$ ) spectrum of complex **4b**





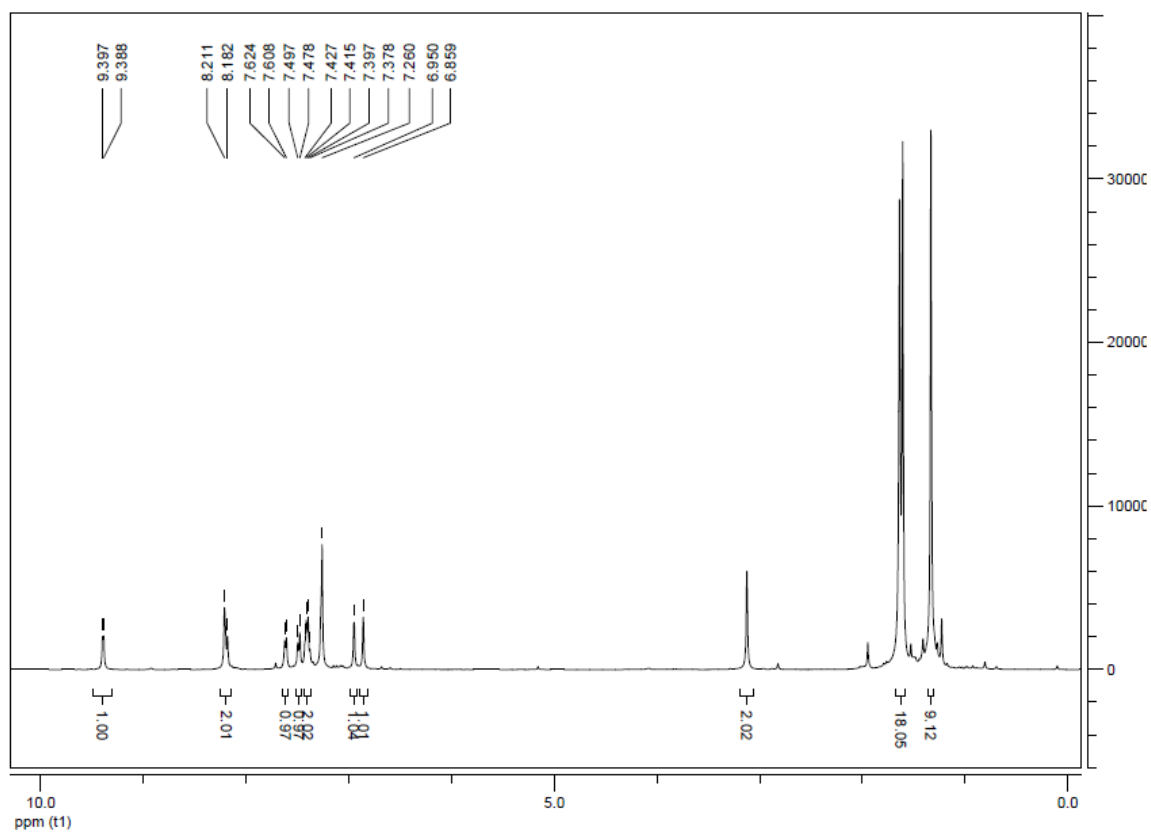

**Figure S9.**  $^1\text{H}$  NMR(400 MHz,  $\text{CDCl}_3$ ) spectrum of complex **4e**

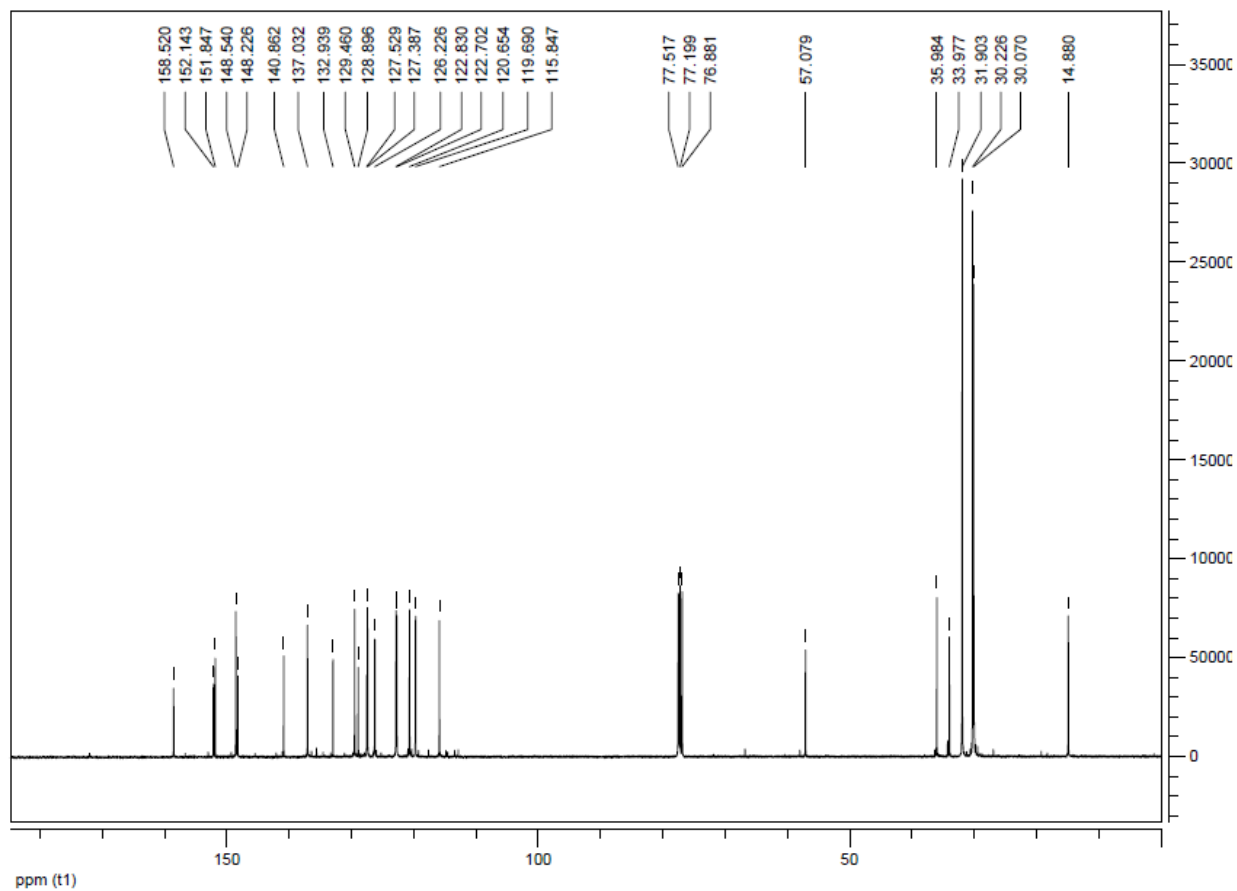

**Figure S10.**  $^{13}\text{C}$  NMR(100 MHz,  $\text{CDCl}_3$ ) spectrum of complex **4e**

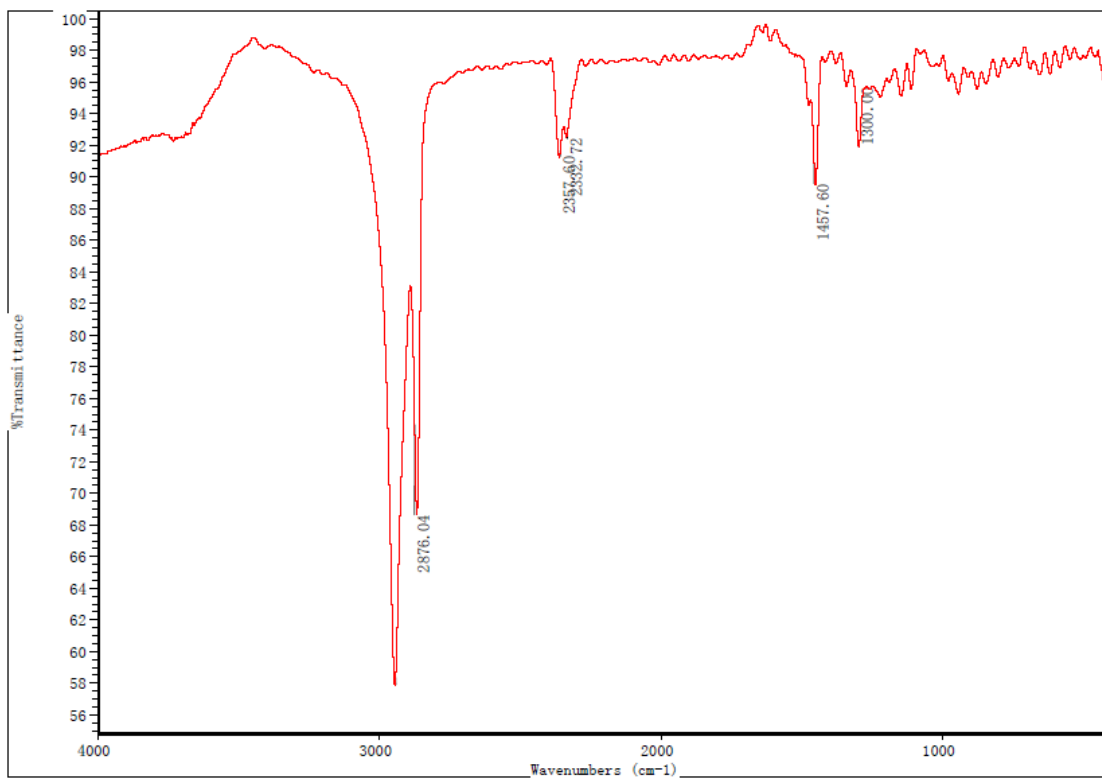

**Figure S11.** FT IR spectrum of PNB (entry 7).

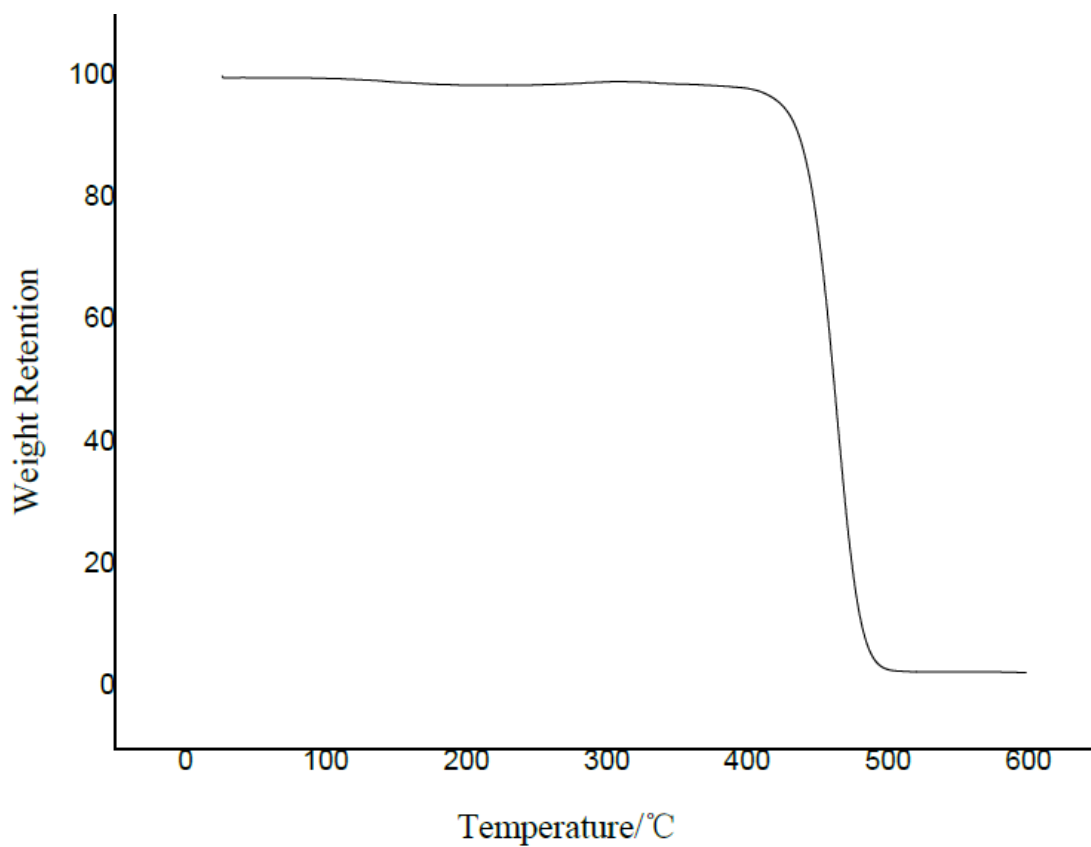

**Figure S12.** TGA curve of PNB (entry 7).
